# Supplementary material
Source: PubMed Central journal article supplement (PMC7808089)
Supplement: mmc1.pdf [file mmc1.pdf]

## Additional references

27. Fisher B, Thomas D, Peterson B. Hypertonic saline lowers raised intracranial pressure in children after head trauma. *J Neurosurg Anesthesiol* 1992; **4**:4–10
28. Schwarz S, Schwab S, Bertram M, et al. Effects of hypertonic saline hydroxyethyl starch solution and mannitol in patients with increased intracranial pressure after stroke. *Stroke* 1998; **29**:1550–5
29. Afifi W, Abdallah I, Yosry M, et al. The effect of a single dose of 3% hypertonic saline versus mannitol 20% for treatment of brain oedema and intracranial hypertension in postoperative patients with supratentorial gliomata. *Egyptian J Anaesth* 2003; **19**: 371–79
30. Battison C, Andrews PJ, Graham C, et al. Randomized, controlled trial on the effect of a 20% mannitol solution and a 7.5% saline/6% dextran solution on increased intracranial pressure after brain injury. *Crit Care Med* 2005; **33**:196–202
31. Harutjunyan L, Holz C, Rieger A, Menzel M, Grond S, Soukup J. Efficiency of 7.2% hyper tonic saline hydroxyethyl starch 200/0.5 versus mannitol 15% in the treatment of increased intracranial pressure in neurosurgical patients - a randomized clinical trial. *Crit Care Med* 2005;**9**: R530–40
32. Bentsen G, Breivik H, Lundar T, et al. Hypertonic saline (7.2%) in 6% hydroxyethyl starch reduces intracranial pressure and improves hemodynamics in a placebo-controlled study involving stable patients with subarachnoid hemorrhage. *Crit Care Med* 2006; **34**:2912–2917
33. Francony G, Fauvage B, Falcon D, Canet C, Dilou, H, Lavagne P, et al. Equimolar doses of mannitol and hypertonic saline in the treatment of increased intracranial pressure. *Crit Care Med* 2008;**36**(3):795–800
34. Ichai C, Armando G, Orban JC, et al. Sodium lactate versus mannitol in the treatment of intracranial hypertensive episodes in severe traumatic brain-injured patients. *Int Care Med* 2009;**35**(3):471-9
35. Oddo M, Levine JM, Frangos S, et al. Effect of mannitol and hypertonic saline on cerebral oxygenation in patients with severe traumatic brain injury and refractory intracranial hypertension. *J Neurol Neurosurg Psychiatry* 2009; **80**:916–20
36. Boudreaux, C, Brown, J. Randomized controlled trial comparing the effect of 8.4% sodium bicarbonate and 5% sodium chloride on raised intracranial pressure after traumatic brain injury. *Neurocrit Care* 2011;**15**(1):42-45
37. Cottenceau V, Masson F, Mahamid E, et al. Comparison of effects of equiosmolar doses of mannitol and hypertonic saline on cerebral blood flow and metabolism in traumatic brain injury. *J Neurotrauma*. 2011;**28**(10):2003-2012
38. Morrison, L, Baker, A, Rhind, S, et al. The Toronto prehospital hypertonic resuscitation-head injury and multiorgan dysfunction trial: Feasibility study of a randomized controlled trial. *J Crit Care* 2011;**26**(4):363-372.
39. Sakellaridis N, Pavlou E, Karatzas S, Chroni D, Vlachos K, Chatzopoulos K, et al. Comparison of mannitol and hypertonic saline in the treatment of severe brain injuries. *J Neurosurg* 2011 **114**:545–548
40. Scalfani, M, Dhar, R, Zazulia, A, et al. Effect of osmotic agents on regional cerebral blood flow in traumatic brain injury. *J Crit Care* 2012;**27**(5):526.e7-e12
41. Mangat HS, Chiu YL, Gerber LM, Alimi M, Ghajar J, Hartl R. Hypertonic saline reduces cumulative and daily intracranial pressure burdens after severe traumatic brain injury. *J Neurosurg*. 2014;**122**(1):1-9
